# Supplementary material
Source: publisher figshare collection journal article supplement (https://gsajournals.figshare.com/ndownloader/files/13806434)
Supplement: Supplementary file 1 [file 13806434]

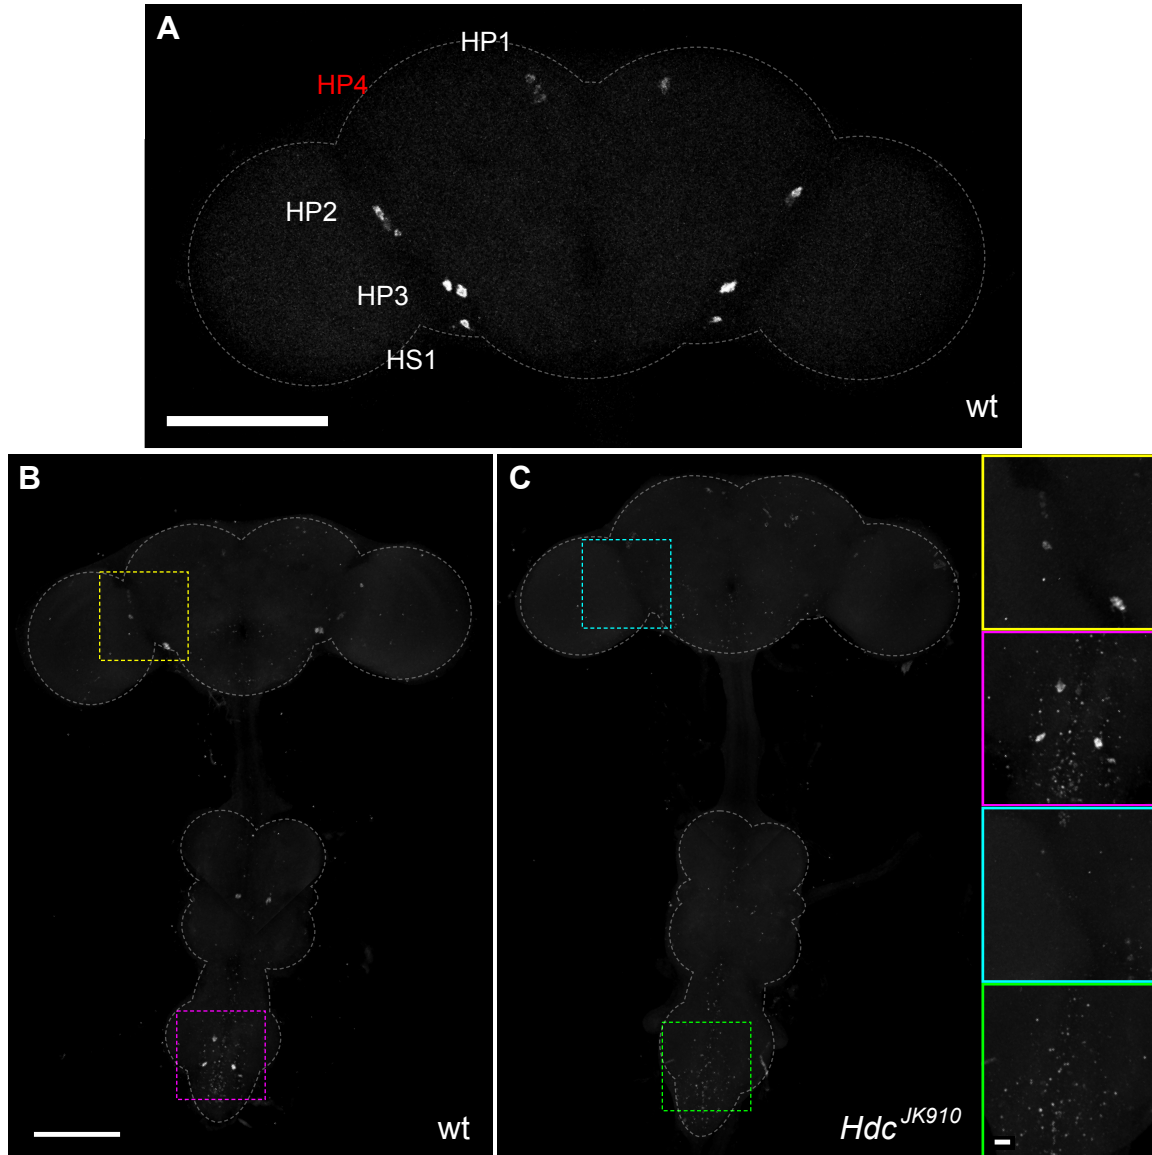

**Figure S4.** Histamine probe expression pattern and validation. (A) Distribution of *Hdc* mRNA in a wild-type brain labeled with DL550 *Hdc* FISH probe. Clusters of histaminergic neurons are grouped according to Nassel (1999), with the exception of HP4 (red), which was not observed. Scale bar, 100  $\mu$ m. (B-C) Comparison of wild-type (B) and *Hdc*<sup>JK910</sup> (C) CNSs labeled with *Hdc*-Cy3 FISH probes. The brain and VNC images were stitched together with the Fiji pairwise stitching plugin (Preibisch *et al.* 2009). Similar regions of the brain and VNC for both wild type and mutant are shown enlarged on the right. Scale bars, 100  $\mu$ m (left) and 10  $\mu$ m (right).
